## CORRESPONDENCE

a secure and steady ECG tracing. We hope this information will be useful to some of the readers.

**Ram S. Ravindran, M.D.**

Department of Anesthesia  
Wishard Memorial Hospital  
Indianapolis, Indiana 46254

(Accepted for publication June 17, 1997.)

Anesthesiology  
1997; 87:712  
© 1997 American Society of Anesthesiologists, Inc.  
Lippincott-Raven Publishers

## Response to: Possible Contribution of Transmembrane $\text{Ca}^{2+}$ Influx to Adenylate Cyclase-mediated NO-cGMP Relaxation in Rat Aorta

*To the Editor:*—I enjoyed reading the interesting article by Iranami *et al.* entitled "A Beta-adrenoceptor Agonist Evokes a Nitric Oxide-cGMP relaxation Mechanism Modulated by Adenylyl Cyclase in Rat Aorta."<sup>1</sup> In their studies, they demonstrated that (1) isoproterenol can induce NO production in endothelial cells and (2) halothane did not inhibit isoproterenol-induced relaxation, but it inhibited acetylcholine-induced relaxation. The authors proposed that halothane inhibits NO-cGMP relaxation only when constitutive nitric oxide synthase (cNOS) is activated by  $\text{Ca}^{2+}$  released from internal stores.

However, there are several issues that need to be mentioned. First, in our experimental studies, neither isoproterenol nor forskolin, an adenylyl cyclase activator, was shown to directly activate nonselective cation current in cultured endothelial cells (unpublished observation).<sup>2-4</sup> Thus, the increase in  $\text{Ca}^{2+}$  influx caused by the increase of adenylyl cyclase activity is thus difficult to explain. Second, the statement that halothane inhibits the NO-cGMP relaxation only when cNOS is activated by  $\text{Ca}^{2+}$  released from internal stores is not entirely explained by the previous results showing that halothane can attenuate A23187-mediated endothelium-dependent relaxation<sup>5</sup> and increase in cGMP.<sup>6</sup> A23187, a  $\text{Ca}^{2+}$  ionophore, can increase  $\text{Ca}^{2+}$  influx from the exterior of the cell and also activate NO-cGMP production.<sup>6</sup> Third, the direct inhibition of halothane on voltage-gated  $\text{Ca}^{2+}$  current in vascular smooth muscle cells<sup>7</sup> may partly account for the failure of halothane to inhibit the isoproterenol-induced relaxation.

I am thus inclined to believe that the effect of halothane on the agonist-induced NO-cGMP mechanism in rat aorta still remains unclear.

**Sheng-Nan Wu, M.D., Ph.D.**

Associate Professor  
Department of Medical Education and Research  
Veterans General Hospital-Kaohsiung

386, Ta-Chung 1st Road  
Kaohsiung City, Taiwan, ROC

## References

1. Iranami H, Hatano Y, Tsukiyama Y, Maeda H, Mizumoto K: A beta-adrenoceptor agonist evokes a nitric oxide-cGMP relaxation mechanism modulated by adenylyl cyclase in rat aorta. *ANESTHESIOLOGY* 1996; 85:1129-38
2. Takeda K, Klepper M: Voltage-dependent and agonist-activated currents in vascular endothelial cells: A review. *Blood Vessels* 1990; 27:169-83
3. Nilius B, Riemann D: Ion channels in human endothelial cells. *Gen Physiol Biophys* 1990; 9:89-111
4. Gericke M, Oike M, Droogmans G, Nilius B: Inhibition of capacitative  $\text{Ca}^{2+}$  entry by  $\text{Cl}^-$  channel blocker in human endothelial cells. *Eur J Pharmacol* 1994; 269:381-4
5. Uggeri MJ, Proctor GJ, Johns RA: Halothane, enflurane, and isoflurane attenuate both receptor- and non-receptor-mediated EDRF production in rat thoracic aorta. *ANESTHESIOLOGY* 1992; 76:1012-7
6. Johns RA, Tichotsky A, Muro M, Spaeth JP, Le Cras TD, Rengasamy A: Halothane and isoflurane inhibit endothelium-derived relaxing factor-dependent cyclic guanosine monophosphate accumulation in endothelial cell-vascular smooth muscle co-cultures independent of an effect on guanylyl cyclase activation. *ANESTHESIOLOGY* 1995; 83:823-34
7. Yamazaki M, Kamitani K, Ito Y, Momose Y: Effects of halothane and diltiazem on L-type calcium current in single smooth muscle cells from rabbit portal veins. *Br J Anesth* 1994; 73:209-13

(Accepted for publication March 18, 1997.)
